# Supplementary material
Source: PubMed Central journal article supplement (PMC4050451)
Supplement: Supp_Fig1.pdf [file Supp_Fig1.pdf]

## Supplementary Data

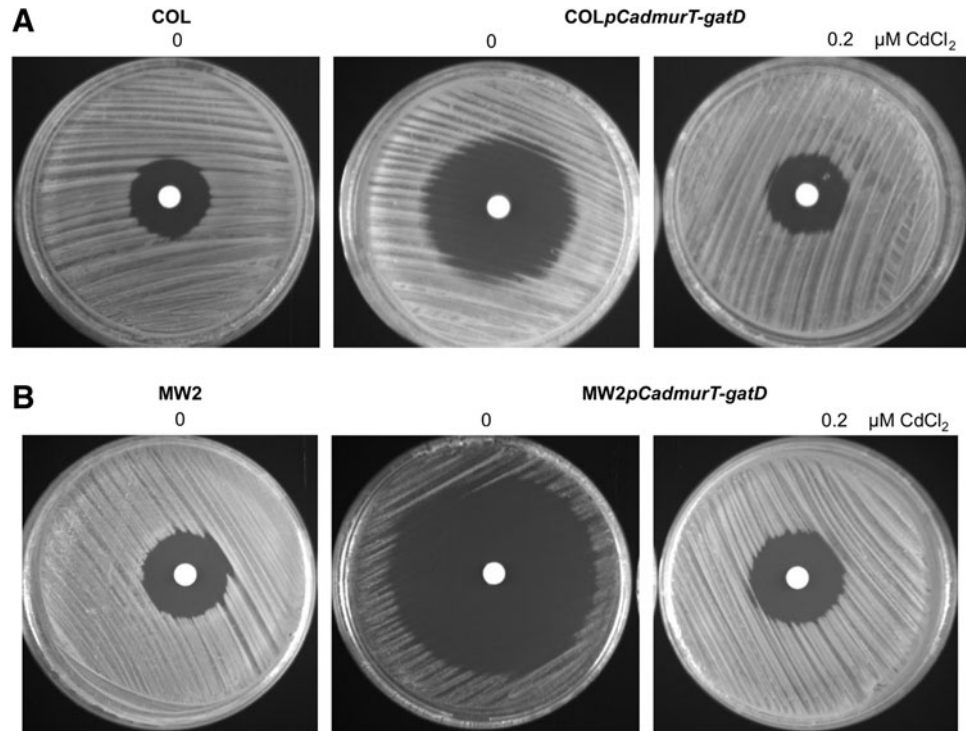

**SUPPLEMENTARY FIG. S1.** Effect of *murT-gatD* conditional expression on beta-lactam resistance phenotype in COL and MW2 strains. Oxacillin inhibition halos (1-mg disks) were determined for COL, COLp*CadmurT-gatD*, (A) MW2, and MW2p*CadmurT-gatD* (B) own under CdCl<sub>2</sub> concentrations of 0 and 0.2 μM.
