# Supplementary material
Source: PubMed Central journal article supplement (PMC4050451)
Supplement: Supp_Fig2.pdf [file Supp_Fig2.pdf]

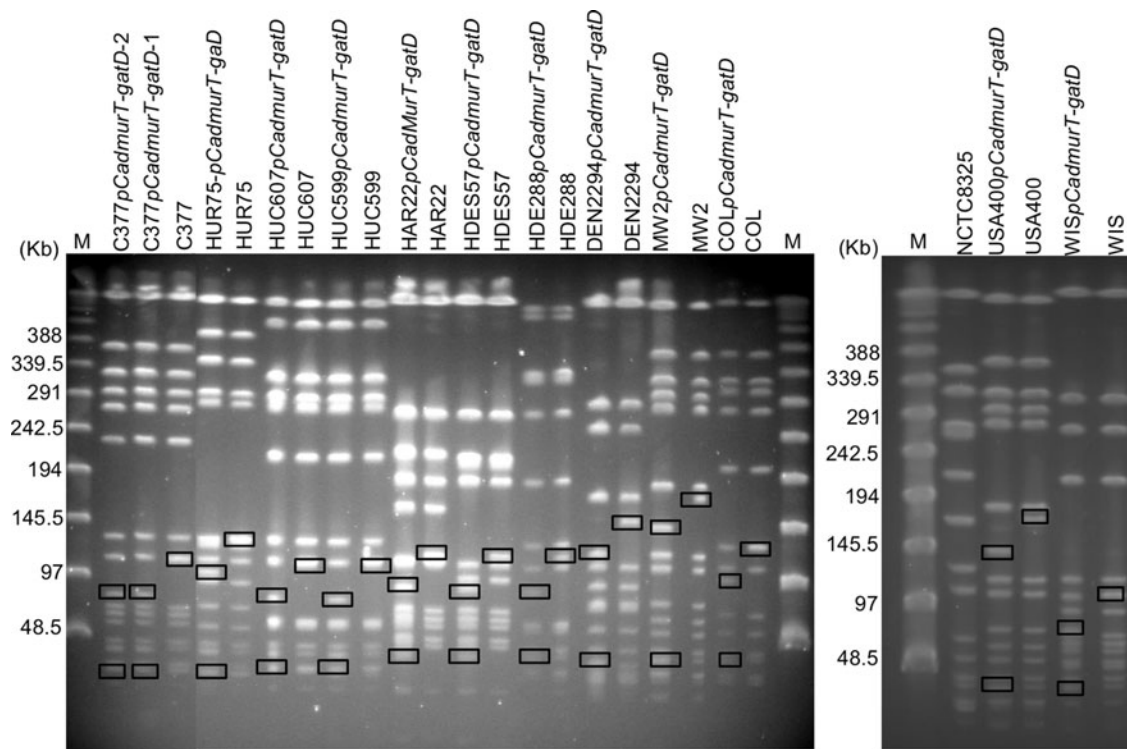

**SUPPLEMENTARY FIG. S2.** PFGE profiles of strains, listed in Table 1, and of their respective *murT-gatD* conditional mutants. The boxes highlight the fragments where *murT-gatD* operon is located in the chromosome. The identification of these fragments was performed by the analysis of *Sma*I PFGE profile of the parental strain and the respective *murT-gatD* conditional mutant and through Southern blotting. Numbers on the left side indicate the size (Kb) of the molecular marker (M). PFGE, pulsed-field gel electrophoresis.
